# Supplementary material for: Smart Microparticles with a pH-responsive Macropore for Targeted Oral Drug Delivery
Source: PubMed Central journal article supplement (PMC5465058; doi:10.1038/s41598-017-03259-x), 2017-06-08
Supplement: 41598_2017_3259_MOESM1_ESM.pdf [file 41598_2017_3259_MOESM1_ESM.pdf]

# **Smart Microparticles with a pH-responsive Macropore for Targeted Oral Drug Delivery**

**Ankit Kumar, Carlo Montemagno<sup>\*</sup>, and Hyo-Jick Choi<sup>\*</sup>**

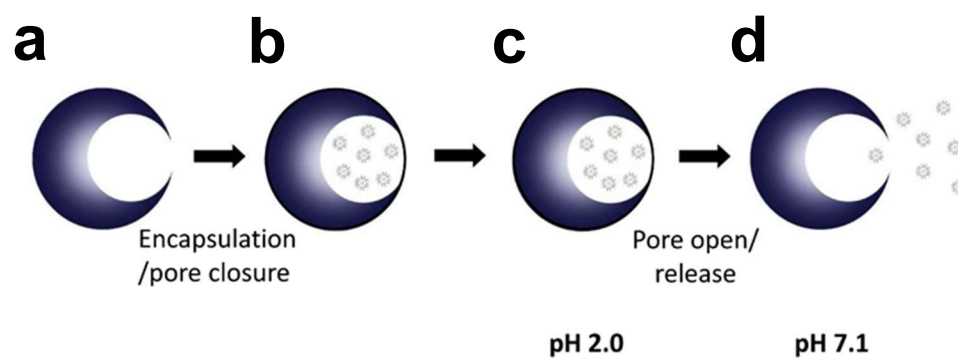

**Figure S1.** Schematic representation of proposed hollow microparticles (MPs) with a macropore. (a) pored MPs, (b) encapsulation of ingredients and pore closure, (c) protection and (d) release of functional ingredients under (c) acidic/(d) neutral/basic environments. Particle size variation is not taken into account.

| Step             | Shelf (°C) | Ramp (min) | Hold (min) | Vacuum (mTorr) |
|------------------|------------|------------|------------|----------------|
| Primary drying   |            |            |            |                |
| 1                | -40        | 0          | 30         | 1000           |
| 2                | -55        | 60         | 1          | 100            |
| 3                | -55        | 0          | 2000       | 100            |
| Secondary drying |            |            |            |                |
| 4                | 30         | 180        | 120        | 300            |

**Figure S2.** Recipe for freeze drying.

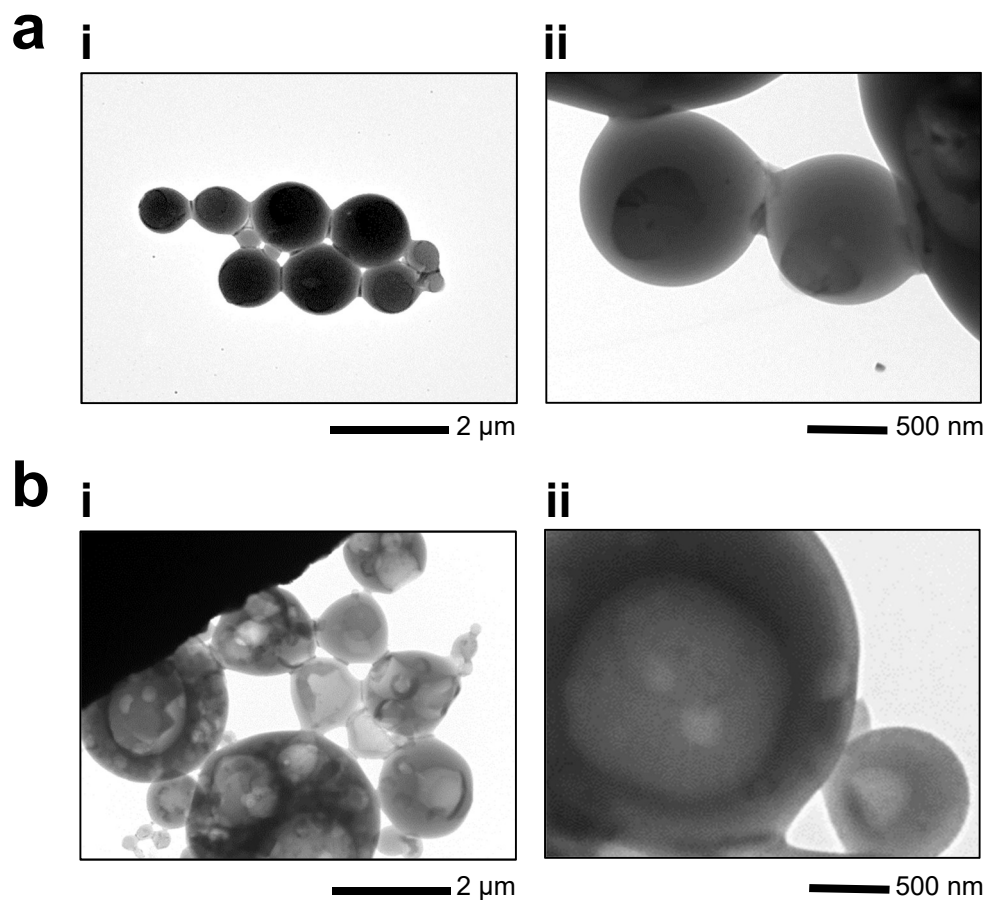

**Figure S3.** Pore closure and opening in response to pH. TEM images of MPs after being subjected to simulated GI tract conditions ((a) 2-hr incubation at pH 2.0, followed by (b) 4-hr incubation at pH 7.1 at 37°C, i: low mag. and ii: high mag.).

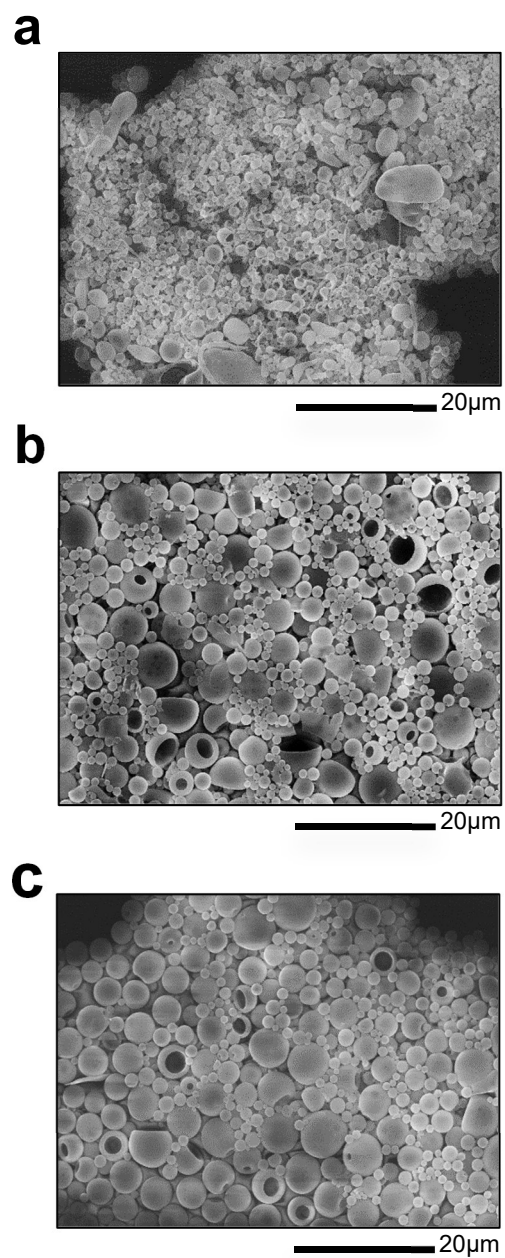

**Figure S4.** SEM images of MPs prepared by room temperature (R.T.) sonication conditions deployed for different time intervals: (a) 5 min, (b) 30 min, and (c) 60 min sonication.

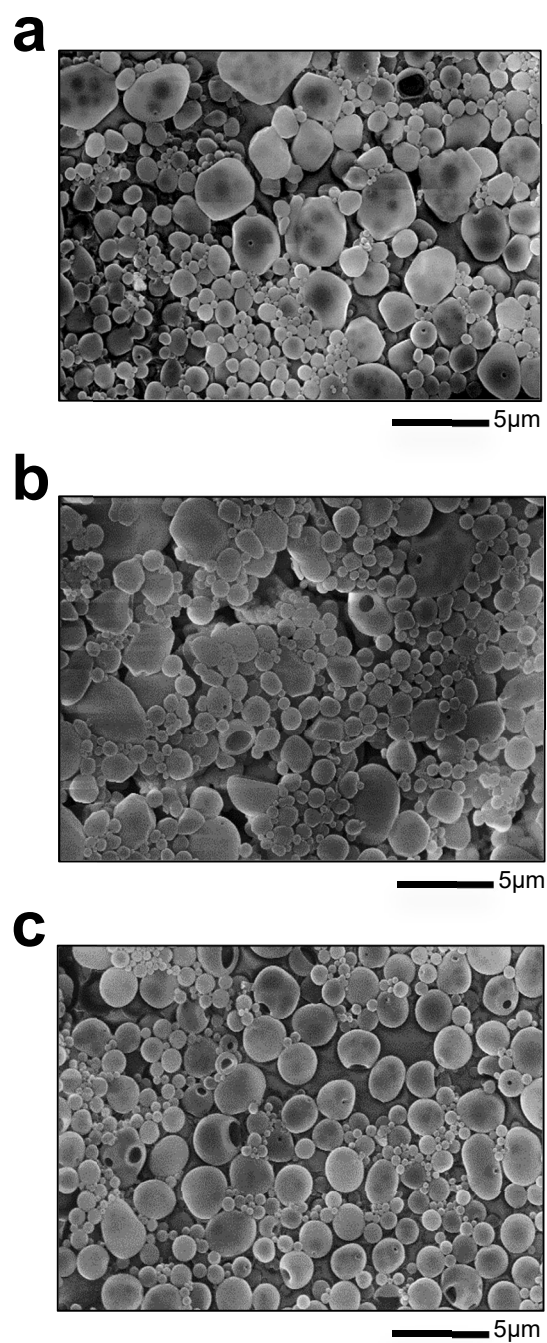

**Figure S5.** SEM images of MPs prepared in iced water sonication (sample temperature controlled by iced water surrounding it) for different sonication conditions deployed for different time intervals: (a) 5 min, (b) 30 min, and (c) 60 min sonication.

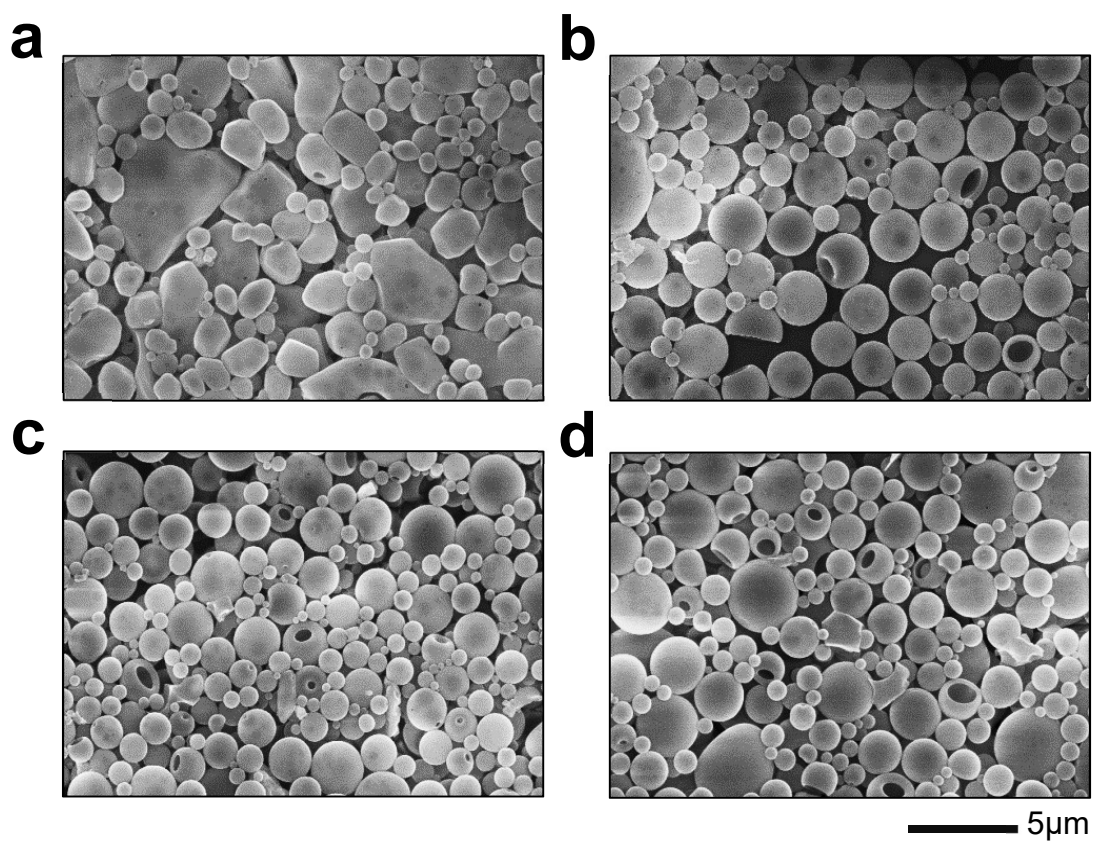

**Figure S6.** SEM images of pored MPs prepared by 5 min R.T. sonication, followed by stir incubation for different time intervals: (a) 0 hr, (b) 2 hrs, (c) 4 hrs, and (d) 8 hrs.

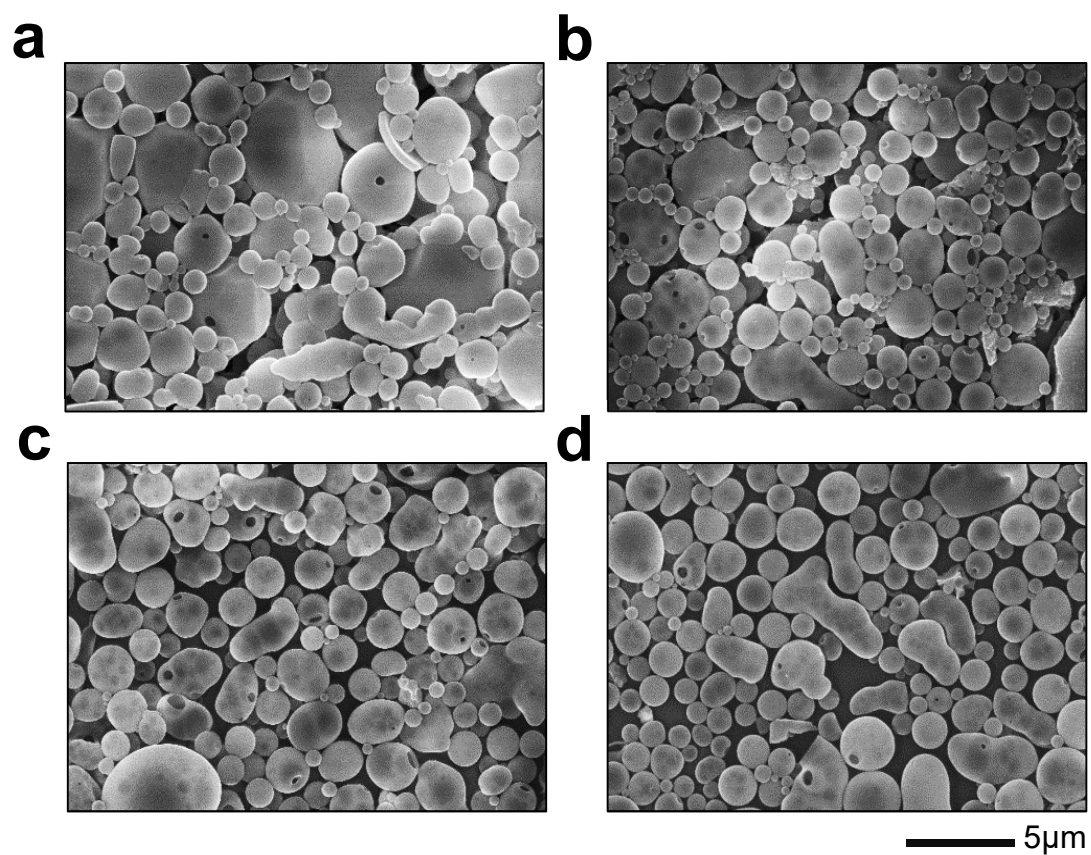

**Figure S7.** SEM images of pored MPs prepared by 5 min iced water sonication, followed by stir incubation for different time intervals: (a) 0 hr, (b) 2 hrs, (c) 4 hrs, and (d) 8 hrs.



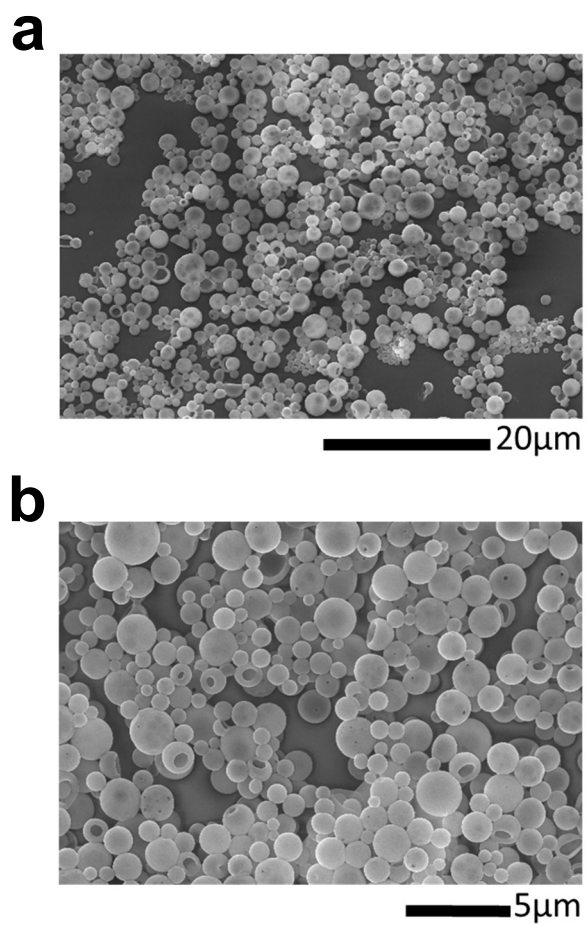

**Figure S8.** SEM images of MPs with a macropore synthesized from Eudragit EPO, a cationic copolymer. (a) Low mag. and (b) high mag.

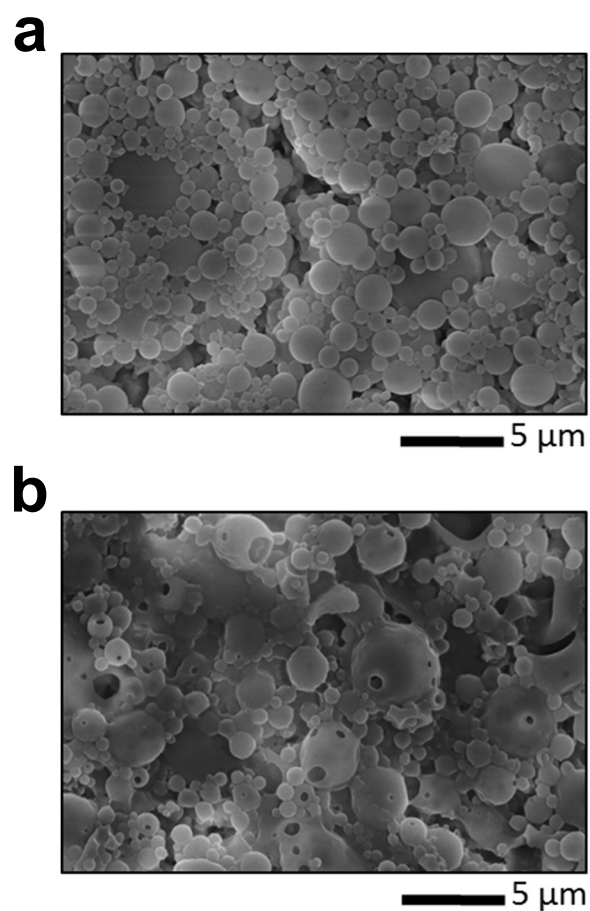

**Figure S9.** SEM images of MPs after being subjected to **(a)** 2-hr incubation in simulated gastric fluid with pepsin (at pH 2.0 and 37°C) and **(b)** simulated GI tract conditions (2-hr incubation in simulated gastric fluid, followed by 4-hr incubation in simulated intestinal fluid with pancreatin at pH 7.1 and 37°C).

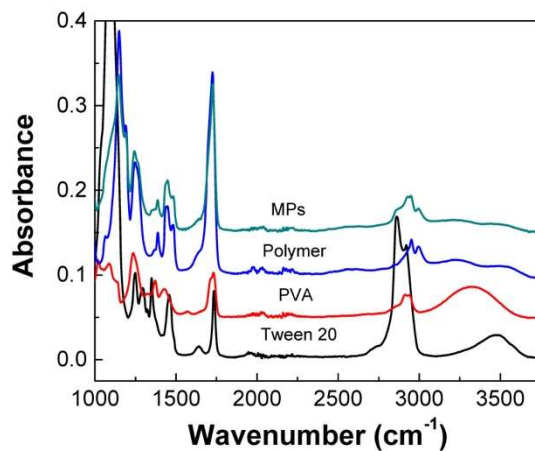

**Figure S10.** FTIR spectra of MPs, original polymer, PVA, and Tween 20. MPs exhibited bands at 2860 cm<sup>-1</sup> and 2920 cm<sup>-1</sup>, which is consistent with characteristic peaks of Tween 20 and Tween 20/PVA, respectively. The presence of characteristic Tween 20 peak on MPs at 2860 cm<sup>-1</sup> indicates that Tween 20 has been incorporated into MPs. However, the characteristic peak at 2920 cm<sup>-1</sup> can correspond to Tween 20 or PVA.

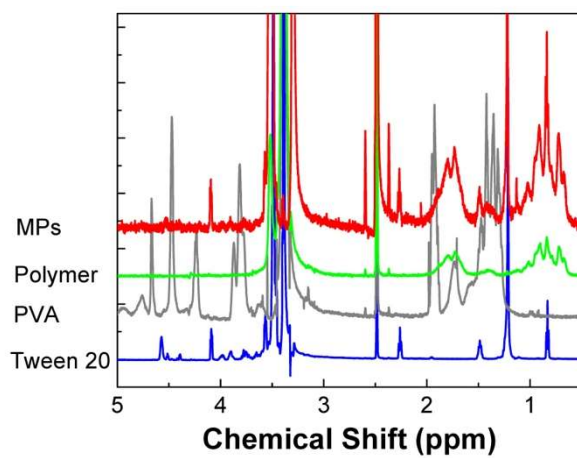

**Figure S11.** <sup>1</sup>H NMR analysis of MPs, original polymer, PVA, and Tween 20. From the comparison of <sup>1</sup>H-NMR spectra of pored MPs with original polymer, Tween 20, and PVA in DMSO solvent, it was confirmed that only Tween 20 was incorporated.
